# Supplementary material for: Identifying key factors for the effectiveness of pancreatic cancer screening: A model‐based analysis
Source: PubMed Central journal article supplement (PMC8251934; doi:10.1002/ijc.33540), 2021-03-25

## APPENDIX

### Identifying Key Factors For The Effectiveness Of Pancreatic Cancer Screening: A Model-based Analysis

**AUTHORS** - Brechtje D.M. Koopmann, MD, Femme Harinck, MD PhD, Sonja Kroep, PhD, Ingrid C.A.W. Konings, MD PhD, Steffie K. Naber, PhD, Iris Lansdorp-Vogelaar, PhD, Paul Fockens, MD PhD, Jeanin E. van Hooft, MD PhD MBA, Djuna L. Cahen MD PhD, Marjolein van Ballegooijen, MD PhD, Marco J. Bruno, MD PhD, Inge M.C.M. de Kok, PhD

#### Table of Contents

|                                                                                                                                                        |        |
|--------------------------------------------------------------------------------------------------------------------------------------------------------|--------|
| <b>Table 1.</b> Assumptions for the sensitivity analyses on the sensitivity of the screening test and the follow-up strategy.....                      | Page 2 |
| <b>Table 2.</b> Results of the sensitivity analyses for screening at ages 50 to 75, with a 1 and 5 year interval in the Progressive-only pathway.....  | Page 4 |
| <b>Table 3.</b> Results of the sensitivity analyses for screening at ages 50 to 75, with a 1 and 5 year interval in the Indolent Included pathway..... | Page 5 |
| <b>Figure 1.</b> Schematic overview of the natural history in the MISCAN-pancreas model.....                                                           | Page 6 |

**Table 1.** Assumptions for the sensitivity analyses on the sensitivity of the screening test and the follow-up strategy (i.e. management). See Figure 2. Transition 1 ('back to screening') is the effect of (false-) negative test result.

|                  | True stage                | 1.<br>Back to<br>screening | 2.<br>Surveillance,<br>6 months<br>follow up | 3.<br>Resection |
|------------------|---------------------------|----------------------------|----------------------------------------------|-----------------|
| Base case        | Normal                    | 90%                        | 10%                                          | 0%              |
|                  | Preinvasive stage LGD     | 85%                        | 12%                                          | 3%              |
|                  | Preinvasive stage IGD     | 68%                        | 17%                                          | 15%             |
|                  | Preinvasive stage HGD     | 26%                        | 44%                                          | 30%             |
|                  | Preclinical I             | 10%                        | 9%                                           | 81%             |
|                  | Preclinical II            | 7%                         | 7%                                           | 86%             |
|                  | Preclinical III/IV        | 0%                         | 0%                                           | 100%*           |
| Sensitivity -10% | Normal                    | 90%                        | 10%                                          | 0%              |
|                  | Preinvasive stage LGD     | 86%                        | 11%                                          | 3%              |
|                  | Preinvasive stage IGD     | 62%                        | 24%                                          | 14%             |
|                  | Preinvasive stage HGD     | 44%                        | 33%                                          | 23%             |
|                  | Preclinical I             | 19%                        | 8%                                           | 73%             |
|                  | Preclinical II            | 16%                        | 6%                                           | 78%             |
|                  | Preclinical III/IV        | 0%                         | 0%                                           | 100%*           |
| Sensitivity -5%  | Normal                    | 90%                        | 10%                                          | 0%              |
|                  | Preinvasive stage LGD     | 86%                        | 11%                                          | 3%              |
|                  | Preinvasive stage IGD     | 60%                        | 26%                                          | 14%             |
|                  | Preinvasive stage HGD     | 30%                        | 41%                                          | 29%             |
|                  | Preclinical cancer I      | 14%                        | 9%                                           | 77%             |
|                  | Preclinical cancer II     | 12%                        | 6%                                           | 82%             |
|                  | Preclinical cancer III/IV | 0%                         | 0%                                           | 100%*           |
| Sensitivity +5%  | Normal                    | 90%                        | 10%                                          | 0%              |
|                  | Preinvasive stage LGD     | 84%                        | 13%                                          | 3%              |
|                  | Preinvasive stage IGD     | 66%                        | 22%                                          | 12%             |
|                  | Preinvasive stage HGD     | 33%                        | 40%                                          | 27%             |
|                  | Preclinical cancer I      | 5%                         | 10%                                          | 86%             |
|                  | Preclinical cancer II     | 2%                         | 7%                                           | 91%             |
|                  | Preclinical cancer III/IV | 0%                         | 0%                                           | 100%*           |
| Sensitivity +10% | Normal                    | 90%                        | 10%                                          | 0%              |
|                  | Preinvasive stage LGD     | 83%                        | 14%                                          | 3%              |
|                  | Preinvasive stage IGD     | 54%                        | 29%                                          | 17%             |
|                  | Preinvasive stage HGD     | 9%                         | 54%                                          | 37%             |
|                  | Preclinical cancer I      | 1%                         | 10%                                          | 89%             |
|                  | Preclinical cancer II     | 0%                         | 7%                                           | 93%             |
|                  | Preclinical cancer III/IV | 0%                         | 0%                                           | 100%*           |

|                                      |                           |     |     |       |
|--------------------------------------|---------------------------|-----|-----|-------|
| All screen positives to resection    | Normal                    | 90% | 10% | 0%    |
|                                      | Preinvasive stage LGD     | 40% | 0%  | 60%   |
|                                      | Preinvasive stage IGD     | 40% | 0%  | 60%   |
|                                      | Preinvasive stage HGD     | 25% | 0%  | 75%   |
|                                      | Preclinical cancer I      | 10% | 0%  | 90%   |
|                                      | Preclinical cancer II     | 7%  | 0%  | 93%   |
|                                      | Preclinical cancer III/IV | 0%  | 0%  | 100%* |
| ≥ Preinvasive stage HGD to resection | Normal                    | 90% | 10% | 0%    |
|                                      | Preinvasive stage LGD     | 40% | 60% | 0%    |
|                                      | Preinvasive stage IGD     | 40% | 60% | 0%    |
|                                      | Preinvasive stage HGD     | 25% | 0%  | 75%   |
|                                      | Preclinical cancer I      | 10% | 0%  | 90%   |
|                                      | Preclinical cancer II     | 7%  | 0%  | 93%   |
|                                      | Preclinical cancer III/IV | 0%  | 0%  | 100%* |
| ≥ Cancer to resection                | Normal                    | 90% | 10% | 0%    |
|                                      | Preinvasive stage LGD     | 40% | 60% | 0%    |
|                                      | Preinvasive stage IGD     | 40% | 60% | 0%    |
|                                      | Preinvasive stage HGD     | 25% | 75% | 0%    |
|                                      | Preclinical cancer I      | 10% | 0%  | 90%   |
|                                      | Preclinical cancer II     | 7%  | 0%  | 93%   |
|                                      | Preclinical cancer III/IV | 0%  | 0%  | 100%* |

\*In case of cancer stage III/IV, 99% of the patients only receives palliative care (no resection)

**Table 2.** Results of the sensitivity analyses for screening at ages 50 to 75, with a 1 and 5 year interval in the Progressive-only pathway. The interval cancer rate is presented as the number of cancer cases (per 100,000 LYs) in the first 5 years after a negative screening test and in the total period after a negative screening test (including at age 75). NNS = Number of screening tests need to perform to prevent one cancer death, NNT = Number needed to treat to prevent one cancer death, NNSurv = Number of surveillance test need to performed to prevent one cancer death.

| <b>Progressive-only pathway</b>                                           | <b>Cancer cases prevented (per 10,000 persons)</b> | <b>Cancer deaths prevented (per 10,000 persons)</b> | <b>Incidence (per 100,000 LYs)</b> | <b>Mortality (per 100,000 LYs)</b> | <b>Interval cancers &lt;5 years (per 100,000 LYs)</b> | <b>All Interval cancers (per 100,000 LYs)</b> | <b>NNS</b> | <b>NNT</b> | <b>NNSurv</b> |
|---------------------------------------------------------------------------|----------------------------------------------------|-----------------------------------------------------|------------------------------------|------------------------------------|-------------------------------------------------------|-----------------------------------------------|------------|------------|---------------|
| NO SCREENING                                                              |                                                    |                                                     | 132                                | 108                                | n.a.                                                  | n.a.                                          | n.a.       | n.a.       | n.a.          |
| <b>Sensitivity analyses for screening annually from age 50 to 75</b>      |                                                    |                                                     |                                    |                                    |                                                       |                                               |            |            |               |
| BASE CASE                                                                 | 454                                                | 433                                                 | 67                                 | 46                                 | 25                                                    | 40                                            | 431        | 2.9        | 47            |
| Sensitivity +5%                                                           | 461                                                | 437                                                 | 66                                 | 45                                 | 23                                                    | 38                                            | 427        | 2.8        | 46            |
| Sensitivity +10%                                                          | 470                                                | 442                                                 | 64                                 | 44                                 | 21                                                    | 36                                            | 422        | 2.8        | 46            |
| Sensitivity -5%                                                           | 445                                                | 427                                                 | 68                                 | 46                                 | 27                                                    | 43                                            | 437        | 2.9        | 47            |
| Sensitivity -10%                                                          | 436                                                | 421                                                 | 69                                 | 47                                 | 30                                                    | 45                                            | 443        | 2.9        | 48            |
| Specificity 85%                                                           | 459                                                | 435                                                 | 66                                 | 45                                 | 25                                                    | 40                                            | 429        | 2.8        | 67            |
| Specificity 95%                                                           | 451                                                | 431                                                 | 67                                 | 46                                 | 24                                                    | 39                                            | 433        | 2.8        | 26            |
| Specificity 100%                                                          | 447                                                | 429                                                 | 68                                 | 46                                 | 24                                                    | 39                                            | 435        | 2.9        | 5             |
| Risk Halved                                                               | 240                                                | 225                                                 | 34                                 | 23                                 | 12                                                    | 20                                            | 844        | 2.8        | 87            |
| Risk Doubled                                                              | 822                                                | 800                                                 | 130                                | 89                                 | 49                                                    | 79                                            | 225        | 3.0        | 26            |
| Increased preclinical stage                                               | 472                                                | 444                                                 | 64                                 | 44                                 | 13                                                    | 21                                            | 416        | 4.5        | 49            |
| Decreased preclinical stage                                               | 371                                                | 371                                                 | 77                                 | 53                                 | 52                                                    | 76                                            | 505        | 2.3        | 52            |
| All screen positives resection                                            | 588                                                | 494                                                 | 47                                 | 37                                 | 13                                                    | 26                                            | 381        | 2.9        | 39            |
| ≥Preinv stage HGD screen positives resection                              | 538                                                | 480                                                 | 55                                 | 39                                 | 20                                                    | 42                                            | 392        | 2.2        | 45            |
| ≥Cancer screen positives resection                                        | -133                                               | 168                                                 | 151                                | 84                                 | 53                                                    | 77                                            | 1087       | 4.8        | 133           |
| Treatment mortality 5%                                                    | 455                                                | 414                                                 | 67                                 | 48                                 | 25                                                    | 40                                            | 450        | 3.0        | 49            |
| <b>Sensitivity analyses for screening every 5 year, from age 50 to 75</b> |                                                    |                                                     |                                    |                                    |                                                       |                                               |            |            |               |
| BASE CASE                                                                 | 198                                                | 256                                                 | 104                                | 71                                 | 123                                                   | 136                                           | 166        | 3.3        | 19            |
| Sensitivity +5%                                                           | 206                                                | 266                                                 | 102                                | 70                                 | 114                                                   | 127                                           | 160        | 3.3        | 19            |
| Sensitivity +10%                                                          | 216                                                | 274                                                 | 101                                | 68                                 | 106                                                   | 120                                           | 155        | 3.3        | 18            |
| Sensitivity -5%                                                           | 187                                                | 246                                                 | 105                                | 72                                 | 133                                                   | 146                                           | 172        | 3.3        | 20            |
| Sensitivity -10%                                                          | 178                                                | 235                                                 | 106                                | 74                                 | 143                                                   | 156                                           | 180        | 3.4        | 21            |
| Specificity 85%                                                           | 199                                                | 257                                                 | 103                                | 71                                 | 123                                                   | 136                                           | 165        | 3.3        | 27            |
| Specificity 95%                                                           | 195                                                | 255                                                 | 104                                | 71                                 | 123                                                   | 136                                           | 167        | 3.3        | 12            |
| Specificity 100%                                                          | 192                                                | 253                                                 | 104                                | 71                                 | 123                                                   | 137                                           | 168        | 3.3        | 4             |
| Risk Halved                                                               | 105                                                | 134                                                 | 53                                 | 36                                 | 62                                                    | 69                                            | 323        | 3.2        | 35            |
| Risk Doubled                                                              | 345                                                | 470                                                 | 200                                | 137                                | 244                                                   | 269                                           | 87         | 3.4        | 12            |
| Increased preclinical stage                                               | 189                                                | 304                                                 | 105                                | 64                                 | 77                                                    | 85                                            | 139        | 4.8        | 19            |
| Decreased preclinical stage                                               | 144                                                | 176                                                 | 110                                | 81                                 | 196                                                   | 214                                           | 242        | 2.8        | 26            |
| All screen positives resection                                            | 329                                                | 325                                                 | 85                                 | 61                                 | 89                                                    | 101                                           | 131        | 3.3        | 14            |
| ≥Preinv stage HGD screen positives resection                              | 185                                                | 248                                                 | 105                                | 72                                 | 123                                                   | 139                                           | 172        | 3.0        | 19            |
| ≥Cancer screen positives resection                                        | -93                                                | 84                                                  | 146                                | 96                                 | 190                                                   | 207                                           | 502        | 6.1        | 60            |
| Treatment mortality 5%                                                    | 198                                                | 247                                                 | 103                                | 72                                 | 123                                                   | 136                                           | 172        | 3.4        | 20            |

**Table 3.** Results of the sensitivity analyses for screening at ages 50 to 75, with a 1 and 5 year interval in the Indolent Included pathway. The interval cancer rate is presented as the number of cancer cases (per 100,000 LYs) in the first 5 years after a negative screening test and in the total period after a negative screening test (including at age 75). NNS = Number of screening tests need to perform to prevent one cancer death, NNT = Number needed to treat to prevent one cancer death, NNSurv = Number of surveillance test need to performed to prevent one cancer death.

| <b>Indolent Included pathway</b>                                          | <b>Cancer cases prevented (per 10,000 persons)</b> | <b>Cancer deaths prevented (per 10,000 persons)</b> | <b>Incidence (per 100,000 LYs)</b> | <b>Mortality (per 100,000 LYs)</b> | <b>Interval cancers &lt;5 years (per 100,000 LYs)</b> | <b>All Interval cancers (per 100,000 LYs)</b> | <b>NNS</b> | <b>NNT</b> | <b>NNSurv</b> |
|---------------------------------------------------------------------------|----------------------------------------------------|-----------------------------------------------------|------------------------------------|------------------------------------|-------------------------------------------------------|-----------------------------------------------|------------|------------|---------------|
| NO SCREENING                                                              |                                                    |                                                     | 132                                | 108                                | n.a.                                                  | n.a.                                          | n.a.       | n.a.       | n.a.          |
| <b>Sensitivity analyses for screening annually from age 50 to 75</b>      |                                                    |                                                     |                                    |                                    |                                                       |                                               |            |            |               |
| BASE CASE                                                                 | 259                                                | 309                                                 | 94                                 | 64                                 | 79                                                    | 106                                           | 600        | 4.1        | 65            |
| Sensitivity +5%                                                           | 268                                                | 316                                                 | 93                                 | 63                                 | 74                                                    | 101                                           | 587        | 4.1        | 64            |
| Sensitivity +10%                                                          | 277                                                | 323                                                 | 92                                 | 62                                 | 69                                                    | 97                                            | 575        | 4.1        | 62            |
| Sensitivity -5%                                                           | 249                                                | 302                                                 | 96                                 | 65                                 | 85                                                    | 112                                           | 615        | 4.2        | 66            |
| Sensitivity -10%                                                          | 241                                                | 295                                                 | 97                                 | 66                                 | 91                                                    | 118                                           | 630        | 4.2        | 68            |
| Specificity 85%                                                           | 264                                                | 311                                                 | 94                                 | 63                                 | 80                                                    | 107                                           | 596        | 4.1        | 93            |
| Specificity 95%                                                           | 256                                                | 307                                                 | 95                                 | 64                                 | 79                                                    | 105                                           | 605        | 4.1        | 36            |
| Specificity 100%                                                          | 249                                                | 303                                                 | 96                                 | 64                                 | 78                                                    | 105                                           | 613        | 4.2        | 7             |
| Risk Halved                                                               | 137                                                | 161                                                 | 48                                 | 33                                 | 41                                                    | 55                                            | 1178       | 4.1        | 122           |
| Risk Doubled                                                              | 460                                                | 569                                                 | 182                                | 123                                | 157                                                   | 206                                           | 314        | 4.3        | 37            |
| Increased preclinical stage                                               | 308                                                | 360                                                 | 82                                 | 51                                 | 39                                                    | 62                                            | 514        | 4.6        | 58            |
| Decreased preclinical stage                                               | 165                                                | 226                                                 | 117                                | 84                                 | 153                                                   | 178                                           | 817        | 4.7        | 87            |
| All screen positives resection                                            | 419                                                | 399                                                 | 71                                 | 51                                 | 51                                                    | 77                                            | 471        | 3.7        | 48            |
| ≥Preinv stage HGD screen positives resection                              | 374                                                | 381                                                 | 78                                 | 53                                 | 67                                                    | 97                                            | 492        | 2.8        | 58            |
| ≥Cancer screen positives resection                                        | -201                                               | 132                                                 | 161                                | 89                                 | 106                                                   | 133                                           | 1385       | 5.6        | 173           |
| Treatment mortality 5%                                                    | 260                                                | 291                                                 | 94                                 | 66                                 | 79                                                    | 106                                           | 638        | 4.4        | 69            |
| <b>Sensitivity analyses for screening every 5 year, from age 50 to 75</b> |                                                    |                                                     |                                    |                                    |                                                       |                                               |            |            |               |
| BASE CASE                                                                 | 31                                                 | 130                                                 | 127                                | 89                                 | 237                                                   | 257                                           | 326        | 6.0        | 38            |
| Sensitivity +5%                                                           | 37                                                 | 136                                                 | 126                                | 89                                 | 230                                                   | 250                                           | 311        | 5.9        | 37            |
| Sensitivity +10%                                                          | 44                                                 | 141                                                 | 125                                | 88                                 | 224                                                   | 244                                           | 299        | 5.8        | 36            |
| Sensitivity -5%                                                           | 24                                                 | 124                                                 | 128                                | 90                                 | 244                                                   | 264                                           | 340        | 6.1        | 40            |
| Sensitivity -10%                                                          | 18                                                 | 119                                                 | 129                                | 91                                 | 251                                                   | 270                                           | 356        | 6.2        | 41            |
| Specificity 85%                                                           | 34                                                 | 132                                                 | 127                                | 89                                 | 237                                                   | 256                                           | 321        | 5.9        | 53            |
| Specificity 95%                                                           | 29                                                 | 128                                                 | 128                                | 90                                 | 237                                                   | 257                                           | 331        | 6.1        | 23            |
| Specificity 100%                                                          | 918                                                | 753                                                 | 128                                | 90                                 | 238                                                   | 257                                           | 336        | 6.1        | 8             |
| Risk Halved                                                               | 16                                                 | 67                                                  | 65                                 | 46                                 | 120                                                   | 130                                           | 639        | 6.0        | 69            |
| Risk Doubled                                                              | 53                                                 | 242                                                 | 242                                | 171                                | 467                                                   | 501                                           | 167        | 6.0        | 22            |
| Increased preclinical stage                                               | 49                                                 | 196                                                 | 119                                | 75                                 | 151                                                   | 170                                           | 215        | 5.8        | 27            |
| Decreased preclinical stage                                               | -13                                                | 71                                                  | 142                                | 106                                | 329                                                   | 346                                           | 590        | 8.2        | 67            |
| All screen positives resection                                            | 137                                                | 189                                                 | 112                                | 81                                 | 194                                                   | 214                                           | 224        | 5.4        | 24            |
| ≥Preinv stage HGD screen positives resection                              | 44                                                 | 134                                                 | 125                                | 89                                 | 235                                                   | 255                                           | 314        | 4.8        | 36            |
| ≥Cancer screen positives resection                                        | -171                                               | 48                                                  | 156                                | 101                                | 281                                                   | 299                                           | 870        | 8.4        | 107           |
| Treatment mortality 5%                                                    | 32                                                 | 120                                                 | 127                                | 91                                 | 237                                                   | 257                                           | 353        | 6.5        | 41            |

**Figure 1.** Schematic overview of the natural history in the MISCAN-pancreas model.

(A) Natural history of a progressive lesion

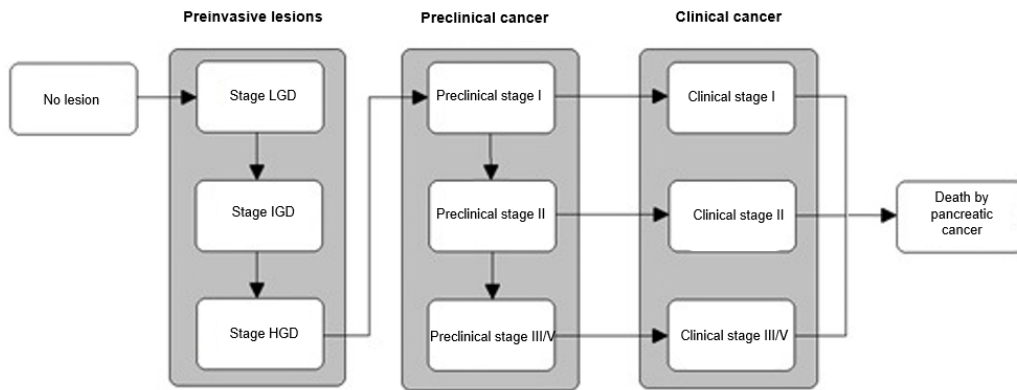

(B) Natural history of an indolent lesion

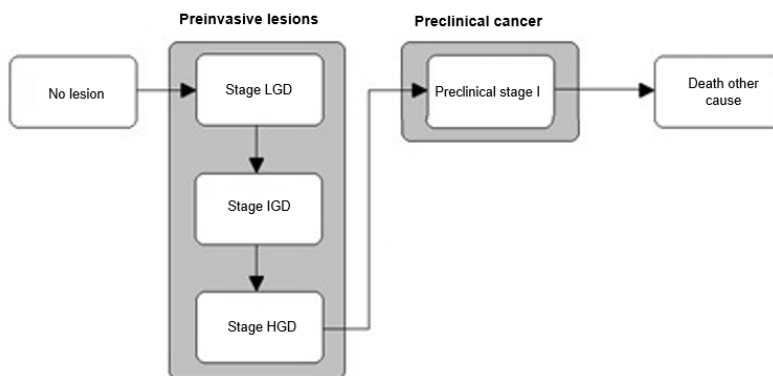

Supplement: IJC-149-337-s001.pdf [file IJC-149-337-s001.pdf]
